# Supplementary material for: Metathesis of alkali-metal amidoborane and FeCl3 in THF
Source: Royal Society of Chemistry journal article supplement (doi:10.1039/c2jm16331d), 2012-01-01
Supplement: c2jm16331d.pdf [file c2jm16331d.pdf]

### Supporting information

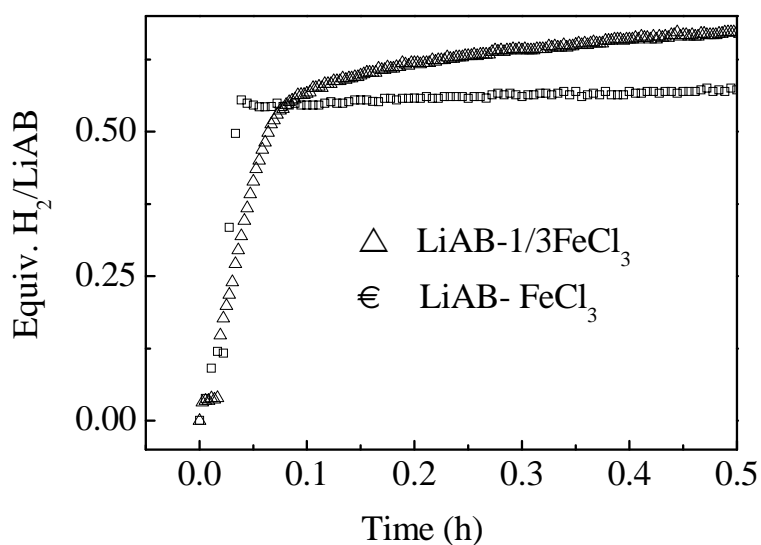

Figure S1. Time-dependent hydrogen desorptions from LiAB-1/3FeCl<sub>3</sub> and LiAB-FeCl<sub>3</sub> THF solutions at ambient temperature within a narrowed time scale (0-0.5 h).

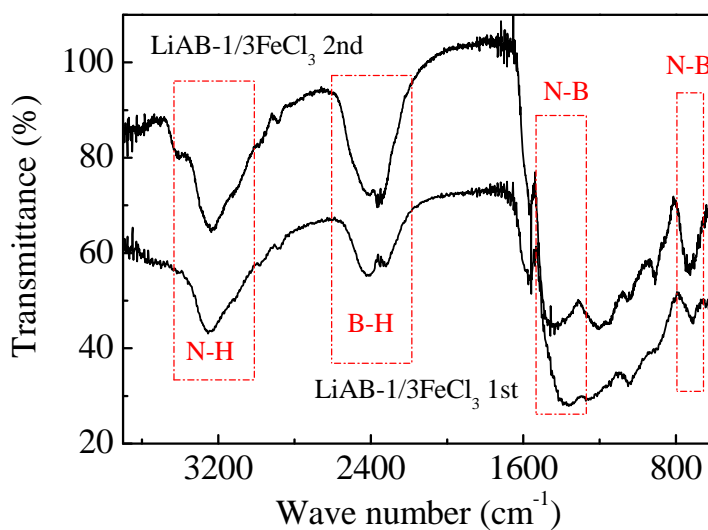

Figure S2. FTIR spectra of precipitates of LiAB-1/3FeCl<sub>3</sub> collected at the end of first and second desorption steps
